# Supplementary material for: Underappreciated contributions of biogenic volatile organic compounds from urban green spaces to ozone pollution
Source: Copernicus journal article supplement (doi:10.5194/acp-25-5233-2025), 2025-05-26
Supplement: Supplementary file 1 [file acp-25-5233-2025-supplement.pdf]

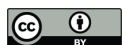

*Supplement of*

## **Underappreciated contributions of biogenic volatile organic compounds from urban green spaces to ozone pollution**

**Haofan Wang et al.**

*Correspondence to:* Yiming Liu (liuym88@mail.sysu.edu.cn) and Qi Fan (eesfq@mail.sysu.edu.cn)

The copyright of individual parts of the supplement might differ from the article licence.

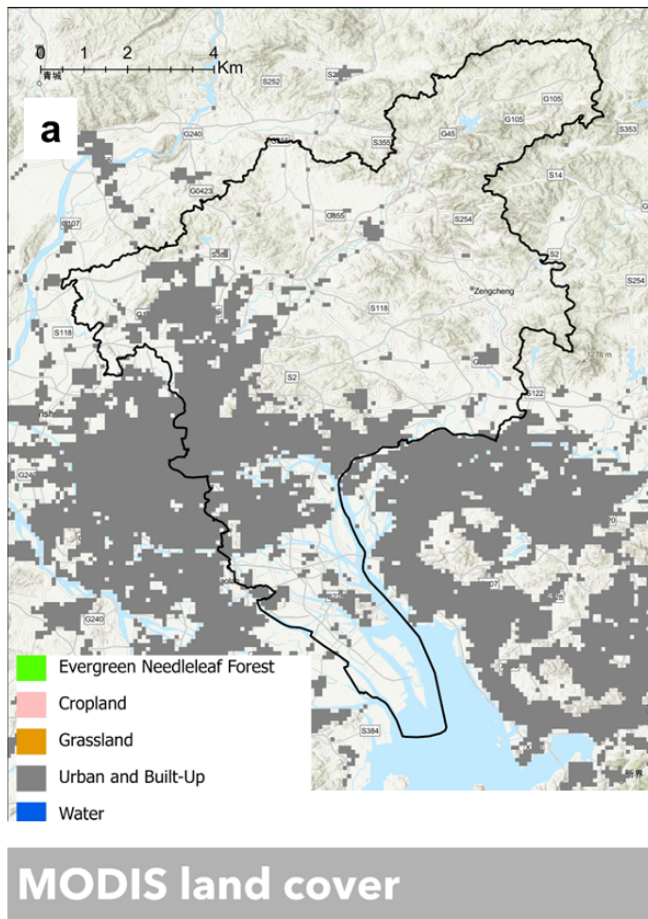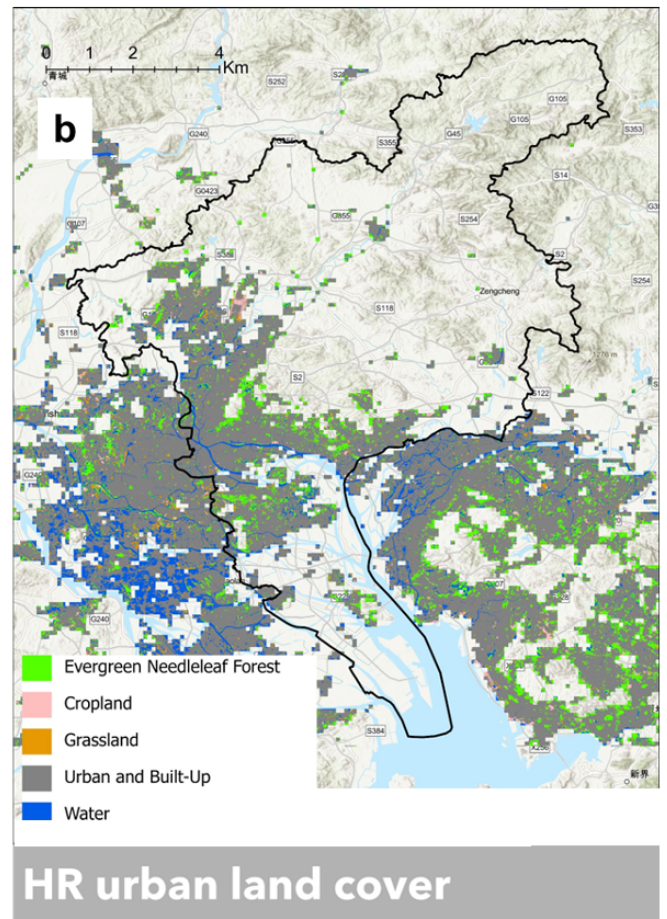

Figure S1 The processed land cover dataset. (a) is the MODIS land cover without UGS and (b) has characterized the UGS base on MODIS land cover.

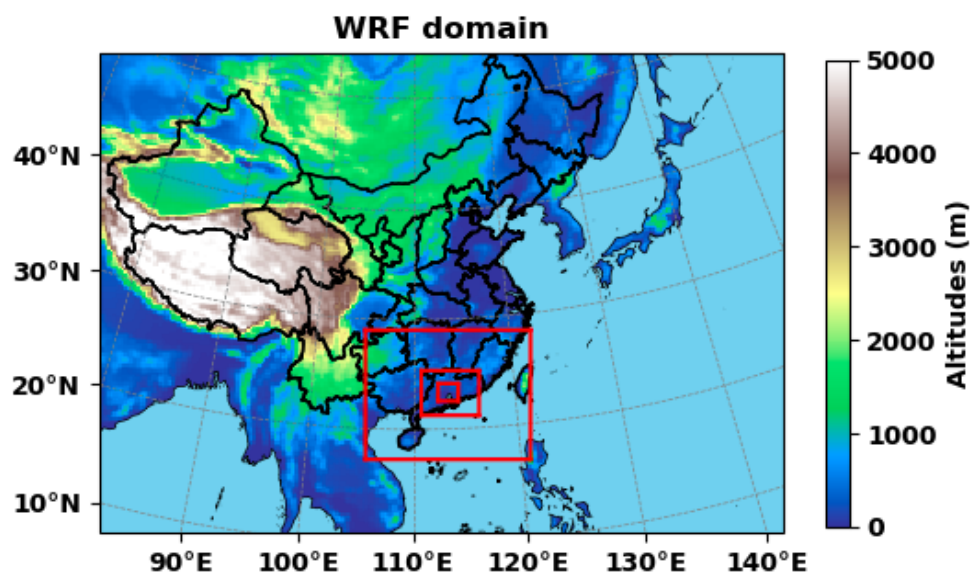

Figure S2 WRF domain nested map with topography.

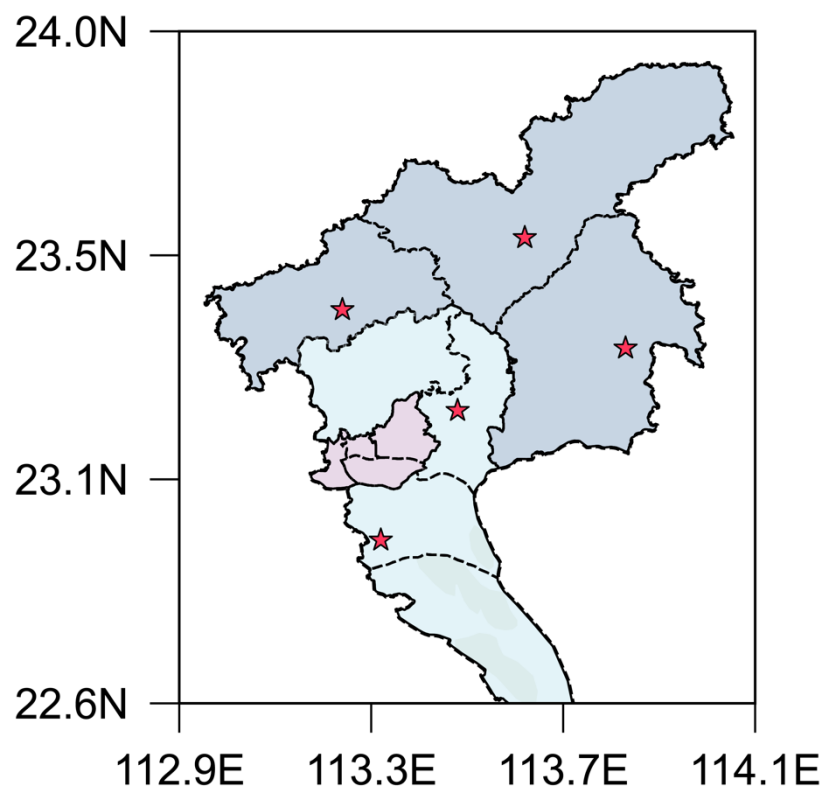

Figure S3 The meteorological station map and various areas.

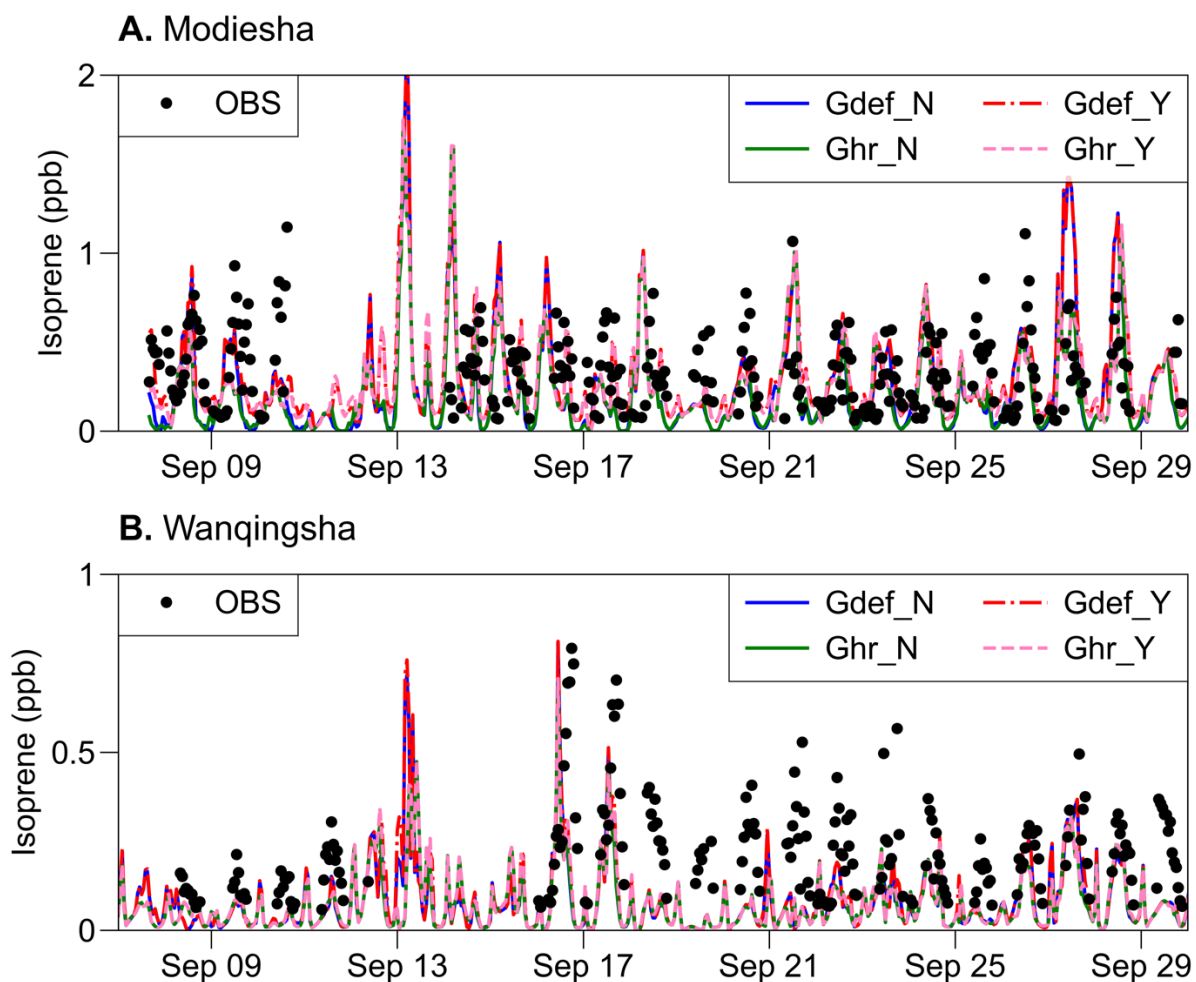

Figure S4 The hourly variations of observed and simulated ISOP concentrations for different cases at Modiesha (a) and Wanqingsha (b) sites during September 2017.

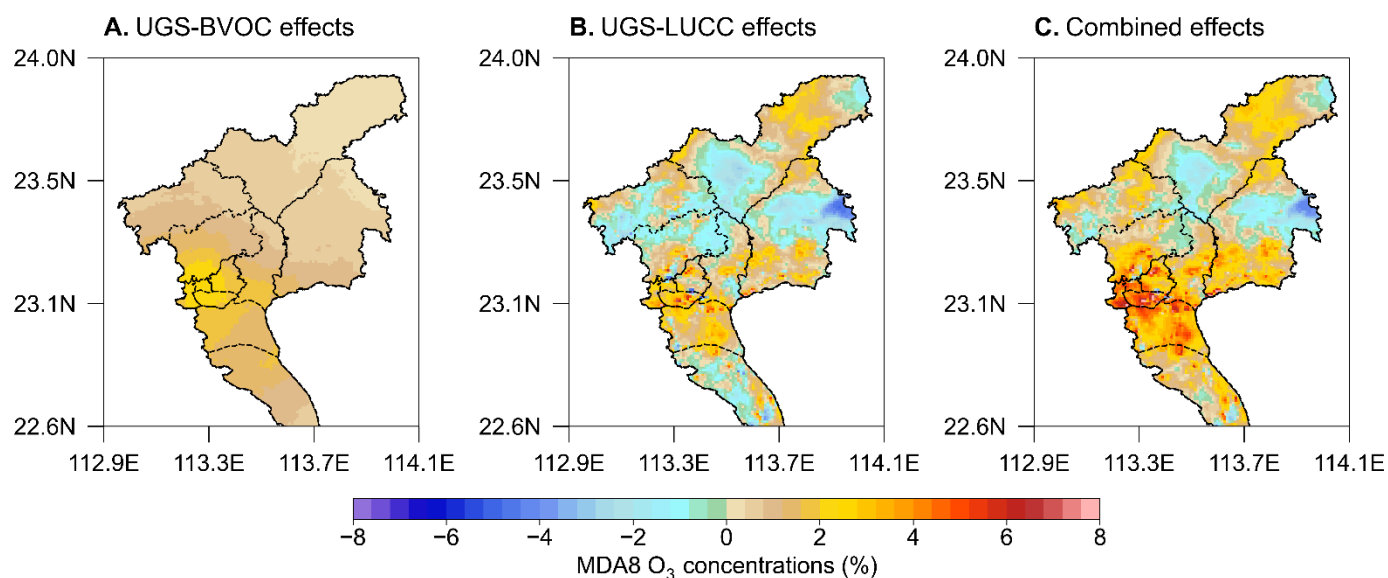

Figure S5 The map of UGS-BVOC effects (a), LUCC effects (b), and combined effects (c) in MDA8 O<sub>3</sub>. Each map shows the difference in average MDA8 O<sub>3</sub> concentrations for each experimental case (Gdef\_Y, Ghr\_N, and Ghr\_Y) relative to the Gdef\_N case over the analysis periods (1 September 2017 to 30 September 2017).

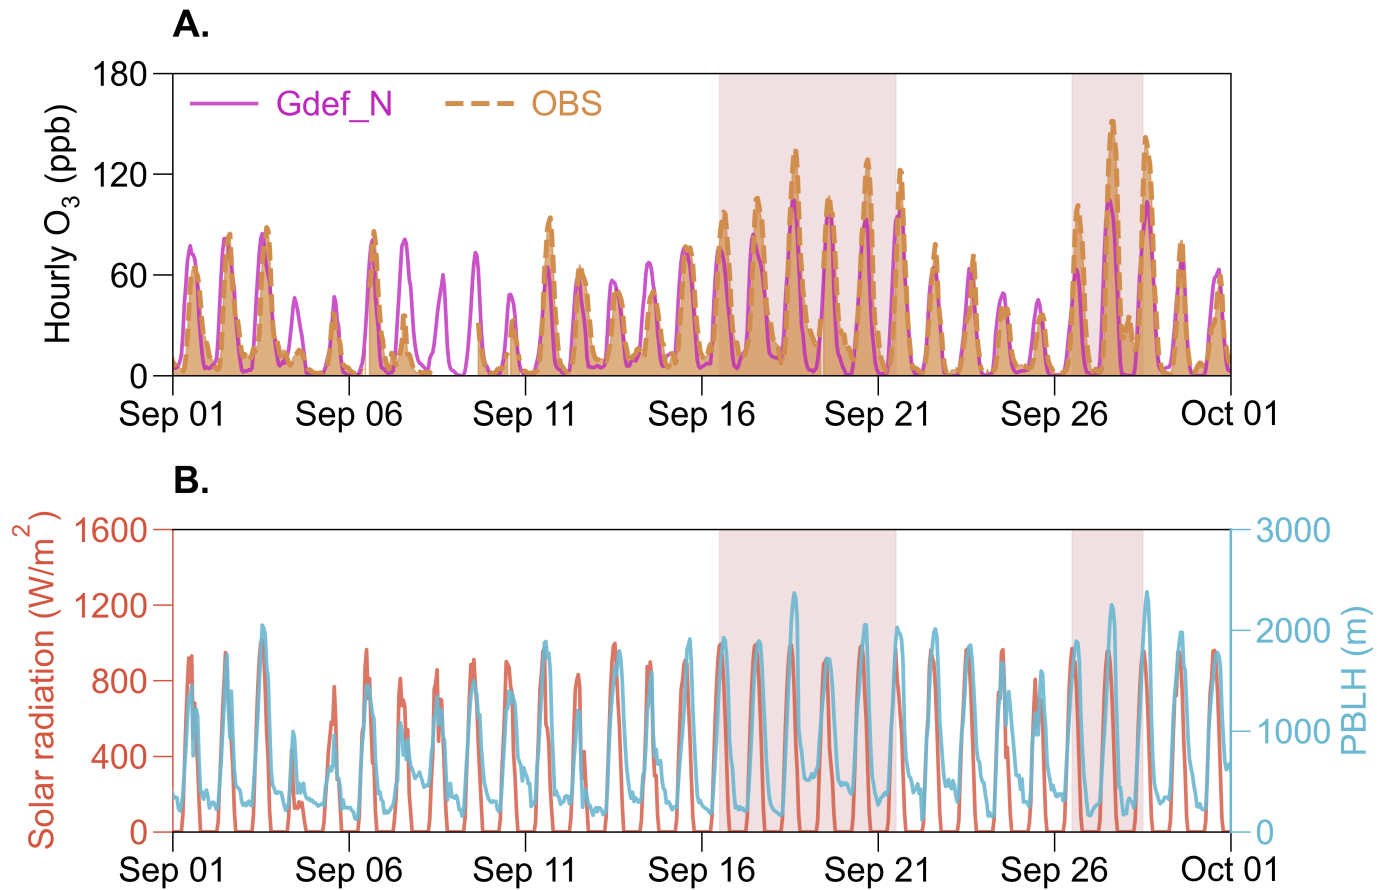

Figure S6 The comparison between the average hourly O<sub>3</sub> values from simulation and observation (A). And the relative grid average values of solar radiation and PBLH (B).

Table S1 the physical parameterizations employed within the WRF.

| Model attribution   | Configuration                                                   |
|---------------------|-----------------------------------------------------------------|
| Microphysics        | Purdue Lin (Chen and Sun, 2002)                                 |
| PBL physics scheme  | MYJ (Janjić, 1994)                                              |
| Shortwave radiation | Goddard (Chou et al., 2001)                                     |
| Longwave radiation  | Rapid Radiative Transfer Model (RRTM) (Mlawer et al., 1997)     |
| Land surface model  | Noah land surface model (LSM) (Ek et al., 2003)                 |
| Urban scheme        | Single-layer urban canopy model (UCM) (Kusaka and Kimura, 2004) |

Table S2 The metrics of meteorological parameters.

|                    | Default land use cover datasets |         |        |      | High-resolution land use cover datasets |         |        |      |
|--------------------|---------------------------------|---------|--------|------|-----------------------------------------|---------|--------|------|
|                    | NME                             | NMB     | MB     | R    | NME                                     | NMB     | MB     | R    |
| Temperature (K)    | 3.15%                           | 2.89%   | 0.76   | 0.82 | 3.15%                                   | 2.88%   | 0.75   | 0.83 |
| Relative humid (%) | 13.01%                          | -12.88% | -10.36 | 0.74 | 13.01%                                  | -12.76% | -10.31 | 0.77 |
| Wind speed (m/s)   | 21.43%                          | 9.30%   | 0.21   | 0.63 | 20.39%                                  | 9.22%   | 0.19   | 0.65 |

**Table S3: The formulas for metrics.**

|     |                                                                                                                                            |
|-----|--------------------------------------------------------------------------------------------------------------------------------------------|
| R   | $\frac{\sum_{i=1}^n (M_i - \bar{M}_i) (O_i - \bar{O}_i)}{\sqrt{\sum_{i=1}^n (M_i - \bar{M}_i)^2} \sqrt{\sum_{i=1}^n (O_i - \bar{O}_i)^2}}$ |
| NMB | $\frac{\sum_{i=1}^n (M_i - O_i)}{\sum_{i=1}^n O_i}$                                                                                        |
| NME | $\frac{\sum_{i=1}^n  M_i - O_i }{\sum_{i=1}^n O_i}$                                                                                        |
| MB  | $\frac{\sum_{i=1}^n (M_i - O_i)}{n}$                                                                                                       |

Where  $M_i$  and  $O_i$  are the simulated and observed data, respectively.  $\bar{M}_i$  and  $\bar{O}_i$  are the average of the simulated and observed data, respectively.  $n$  is the number of samples.

**Table S4 The estimate of the UGS-BVOC emission in Guangzhou city based on high-resolution land use cover (units: Gg)**

| Species        | Abbreviations | Urban (Gg) | Suburban (Gg) | Rural (Gg) | Total (Gg) |
|----------------|---------------|------------|---------------|------------|------------|
| Acetic acid    | AACD          | 0.88       | 2.43          | 1.18       | 4.49       |
| Acetaldehyde   | ALD2          | 3.48       | 11.57         | 5.86       | 20.91      |
| Formaldehyde   | FORM          | 0.94       | 3.90          | 2.18       | 7.02       |
| Methanol       | MEOH          | 12.54      | 41.36         | 20.46      | 74.36      |
| Formic acid    | FACD          | 2.81       | 7.83          | 3.80       | 14.44      |
| Ethane         | ETHA          | 2.14       | 8.40          | 4.65       | 15.19      |
| Ethanol        | ETOH          | 3.64       | 12.13         | 6.13       | 21.90      |
| Acetone        | ACET          | 6.22       | 21.47         | 11.66      | 39.35      |
| Propane        | PRPA          | 2.08       | 8.19          | 4.55       | 14.82      |
| Ethene         | ETH           | 3.95       | 15.60         | 8.67       | 28.22      |
| Isoprene       | ISOP          | 47.57      | 117.00        | 48.10      | 212.67     |
| Monoterpenes   | TERP          | 24.11      | 74.48         | 37.59      | 136.18     |
| Alpha pinene   | APIN          | 11.30      | 29.97         | 13.18      | 54.45      |
| Methane        | ECH4          | 0.04       | 0.14          | 0.08       | 0.26       |
| Sesquiterpenes | SESQ          | 4.31       | 11.88         | 5.95       | 22.14      |
| Total          | Total         | 126.01     | 366.35        | 174.04     | 666.40     |
